# Supplementary material
Source: MDPI journal article supplement (https://www.mdpi.com/2073-4441/12/8/2130)
Supplement: s1 [file s1]

# The Role of Experience and Different Sources of Knowledge in Shaping Flood Risk Awareness

Elena Mondino <sup>1,2,\*</sup>, Anna Scolobig <sup>3</sup>, Marco Borga<sup>4</sup>, and Giuliano Di Baldassarre <sup>1,2</sup>

<sup>1</sup> Department of Earth Sciences, Uppsala University, 752 36 Uppsala, Sweden; giuliano.dibaldassarre@geo.uu.se

<sup>2</sup> Centre of Natural Hazards and Disaster Science (CNDS), 752 36 Uppsala, Sweden

<sup>3</sup> Environmental Governance and Territorial Development Institute, University of Geneva, 1205 Geneva, Switzerland; anna.scolobig@unige.ch

<sup>4</sup> Department of Land, Environment, Agriculture and Forestry, University of Padua, 351 22 Padua, Italy; marco.borga@unipd.it

\* Correspondence: elena.mondino@geo.uu.se

Received: 9 June 2020; Accepted: 22 July; Published: 27 July 2020

## FEELING OF SAFETY

### 1. How long have you been living in Negrar?

1. Since I was born (*skip to question nr. 3*)

2. Since \_\_\_\_\_ (yyyy)

### 2. If you haven't always lived in Negrar, where did you live before?

1. In another municipality within the same region (please specify \_\_\_\_\_)

2. Elsewhere in Italy (please specify \_\_\_\_\_)

3. Elsewhere (please specify \_\_\_\_\_)

4. In another *frazione* of the same municipality

### 3. [On a scale from 1 (min) to 5 (max)] Does "living here" make you feel safe?

| Very unsafe |   |   |   |   | Very safe | I don't know |
|-------------|---|---|---|---|-----------|--------------|
| 1           | 2 | 3 | 4 | 5 | 0         |              |

### 4. [On a scale from 1 (min) to 5 (max)] In the following list, could you indicate to which extent you think each of these events represents a danger for you personally or for your house?

|                  | Not at all |   |   |   | Serious danger | I don't know |
|------------------|------------|---|---|---|----------------|--------------|
| 1. Earthquake    | 1          | 2 | 3 | 4 | 5              | 0            |
| 2. Terror attack | 1          | 2 | 3 | 4 | 5              | 0            |
| 3. Robbery       | 1          | 2 | 3 | 4 | 5              | 0            |
| 4. Drought       | 1          | 2 | 3 | 4 | 5              | 0            |
| 5. Fire          | 1          | 2 | 3 | 4 | 5              | 0            |

**5. Are you or anyone in your family a member of the Civil Protection?**

1. Yes, I am a member

2. Yes, someone of my kin is a member (specify \_\_\_\_\_)

3. Yes, both I and a /some kin are members (specify \_\_\_\_\_)

4. No

**THREAT APPRAISAL**

**6. [On a scale from 1 (min) to 5 (max)] Considering floods, do you think they are a threat for:**

|               | Not at all |   |   |   | Serious threat | I don't know |
|---------------|------------|---|---|---|----------------|--------------|
| 1. Your house | 1          | 2 | 3 | 4 | 5              | 0            |
| 2. Yourself   | 1          | 2 | 3 | 4 | 5              | 0            |
| 3. Your town  | 1          | 2 | 3 | 4 | 5              | 0            |

**7. [On a scale from 1 (min) to 5 (max)] What damages would you expect from a future flood?**

| No damage |   |   |   |   | Very serious damage | I don't know |
|-----------|---|---|---|---|---------------------|--------------|
| 1         | 2 | 3 | 4 | 5 |                     | 0            |

**PERSONAL EXPERIENCE**

**8. In September 2018 in Negrar it happened that \_\_\_\_\_ (short description of the event). Were you here at that time?**

1. Yes

2. No (why \_\_\_\_\_)

**9. Please, rate the seriousness of the damage suffered after the September 2018 event, if any [on a scale from 1 (min) to 5 (max)]**

| No damage |   |   |   |   | Very serious damage | I don't know |
|-----------|---|---|---|---|---------------------|--------------|
| 1         | 2 | 3 | 4 | 5 |                     | 0            |

**10. If you experienced damages, what kind of damages have you experienced?**

---

11. Have you ever been involved in similar events in the past, here or elsewhere?

1. Yes, in the year |   |   |   |   | in \_\_\_\_\_
2. No

12. Before the \_\_\_\_\_ (yyyy) event, would you think something like this might happen here?

1. Yes
2. No
3. I don't know

#### INDIVIDUAL PREPAREDNESS

13. [On a scale from 1 (min) to 5 (max)] Presently, how well prepared do you feel to face a flood, in case it happens again?

|                     |                    |   |   |   |              |
|---------------------|--------------------|---|---|---|--------------|
| Not prepared at all | Very well prepared |   |   |   | I don't know |
| 1                   | 2                  | 3 | 4 | 5 | 0            |

14. Indicate if and when your household intends to adopt the following risk reduction measures. In case they have already been adopted, indicate if before or after the September 2018 event.

|       |                                                     | Will<br>never do | Will<br>maybe do<br>in the<br>long run | Will<br>do in the<br>near<br>future | Alrea<br>dy<br>adopted<br>(post<br>event) | Alrea<br>dy<br>adopted<br>(before<br>evento) | No<br>n so |
|-------|-----------------------------------------------------|------------------|----------------------------------------|-------------------------------------|-------------------------------------------|----------------------------------------------|------------|
|       |                                                     | 1                | 2                                      | 3                                   | 4                                         | 5                                            | 0          |
| St.I  | Elevated floors                                     | 1                | 2                                      | 3                                   | 4                                         | 5                                            | 0          |
|       | Reinforced foundations                              | 1                | 2                                      | 3                                   | 4                                         | 5                                            | 0          |
|       | Backflow valves                                     | 1                | 2                                      | 3                                   | 4                                         | 5                                            | 0          |
| St.II | Water resistant materials                           | 1                | 2                                      | 3                                   | 4                                         | 5                                            | 0          |
|       | Special installation of heating and electric system | 1                | 2                                      | 3                                   | 4                                         | 5                                            | 0          |

|              |                                                          |   |   |   |   |   |   |
|--------------|----------------------------------------------------------|---|---|---|---|---|---|
| Preventativ. | Keeping valuables out of flood-prone areas of the house  | 1 | 2 | 3 | 4 | 5 | 0 |
|              | Keeping expensive appliances above expected flood levels | 1 | 2 | 3 | 4 | 5 | 0 |
|              | Adapted use of groundfloor/basement                      | 1 | 2 | 3 | 4 | 5 | 0 |
| Emer.        | Metal/wood shields                                       | 1 | 2 | 3 | 4 | 5 | 0 |
|              | Household emergency plan                                 | 1 | 2 | 3 | 4 | 5 | 0 |

**15. [On a scale from 1 (min) to 5 (max)] How effective are the risk reduction measures overall at helping to reduce the risk of floods impacting your property and life?**

|                        | Not effective at all |   |   |   |   | Very effective | I don't know |
|------------------------|----------------------|---|---|---|---|----------------|--------------|
| Structural measures I  | 1                    | 2 | 3 | 4 | 5 |                | 0            |
| Structural measures II | 1                    | 2 | 3 | 4 | 5 |                | 0            |
| Avoidance measures     | 1                    | 2 | 3 | 4 | 5 |                | 0            |
| Emergency preparedness | 1                    | 2 | 3 | 4 | 5 |                | 0            |

## COSTS

**16. [On a scale from 1 (min) to 5 (max)] How long will it take you to implement precautionary measures?**

|                        | Very short time |   |   |   |   | Very long time | I don't know |
|------------------------|-----------------|---|---|---|---|----------------|--------------|
| Structural measures I  | 1               | 2 | 3 | 4 | 5 |                | 0            |
| Structural measures II | 1               | 2 | 3 | 4 | 5 |                | 0            |
| Avoidance measures     | 1               | 2 | 3 | 4 | 5 |                | 0            |
| Emergency preparedness | 1               | 2 | 3 | 4 | 5 |                | 0            |

**17. [On a scale from 1 (min) to 5 (max)] How expensive do you think it will be to take precautionary measures?**

|                           | Very<br>low cost |   |   |   | Very<br>expensive |  | I<br>don't<br>know |
|---------------------------|------------------|---|---|---|-------------------|--|--------------------|
| Structural measures I     | 1                | 2 | 3 | 4 | 5                 |  | 0                  |
| Structural measures II    | 1                | 2 | 3 | 4 | 5                 |  | 0                  |
| Avoidance measures        | 1                | 2 | 3 | 4 | 5                 |  | 0                  |
| Emergency<br>preparedness | 1                | 2 | 3 | 4 | 5                 |  | 0                  |

## INCENTIVES

**18. [On a scale from 1 (min) to 5 (max)] Please indicate how much you agree with the following statements.**

|                                                                                                                                                               | Completely<br>disagree |   |   |   | Completel<br>y agree |  | I don't<br>know |
|---------------------------------------------------------------------------------------------------------------------------------------------------------------|------------------------|---|---|---|----------------------|--|-----------------|
| 1. I would feel supported to take<br>precautionary<br>measures myself if some of my neighbors,<br>friends or family does the same.                            | 1                      | 2 | 3 | 4 | 5                    |  | 0               |
| 2. I would feel encouraged to take extra<br>precautions against flooding if I get<br>incentives<br>by the government (with subsidies,<br>exemptions,<br>etc.) | 1                      | 2 | 3 | 4 | 5                    |  | 0               |
| 3. Taking extra precautionary measures<br>against<br>flooding is a priority                                                                                   | 1                      | 2 | 3 | 4 | 5                    |  | 0               |
| 4. By adopting risk reduction measures I<br>contribute to a safer future for my family<br>and<br>fellow citizens                                              | 1                      | 2 | 3 | 4 | 5                    |  | 0               |

## PROTECTION WORKS

**19. Are you aware of any works (infrastructures) built in this area as protection from possible damage from floods?**

1. Yes \_\_\_\_\_ (specify \_\_\_\_\_)
2. No (*skip to question nr. 21*)

20. (If you answered yes to the previous question, answer n.1 to question 19) **How much do you agree with the following statements?** [On a scale from 1 (min) to 5 (max)]

|                                                                                      | Completely disagree |   |   | Completely agree |   |  | I don't know |
|--------------------------------------------------------------------------------------|---------------------|---|---|------------------|---|--|--------------|
| 1. The protection works eliminate the possibility of serious damages                 | 1                   | 2 | 3 | 4                | 5 |  | 0            |
| 2. The protection works are too expensive compared to the expected benefit           | 1                   | 2 | 3 | 4                | 5 |  | 0            |
| 3. The protection works give a sensation of security to people living here in Negrar | 1                   | 2 | 3 | 4                | 5 |  | 0            |
| 4. The protection works promote/help the economic development of our community       | 1                   | 2 | 3 | 4                | 5 |  | 0            |

## KNOWLEDGE

21. **There are many ways to learn about hydrological phenomena. Please evaluate how the following have contributed to your personal knowledge about hydro-geological phenomena** [On a scale from 1 (min) to 5 (max)].

|                                                          | No contribution |   |   | Maximum contribution |   |  | I don't know |
|----------------------------------------------------------|-----------------|---|---|----------------------|---|--|--------------|
| 1. Personal experience                                   | 1               | 2 | 3 | 4                    | 5 |  | 0            |
| 2. Local knowledge (e.g. from elderly people experience) | 1               | 2 | 3 | 4                    | 5 |  | 0            |
| 3. Official training and information initiatives         | 1               | 2 | 3 | 4                    | 5 |  | 0            |
| 4. Personal research                                     | 1               | 2 | 3 | 4                    | 5 |  | 0            |
| 5. Other (specify_____)                                  | 1               | 2 | 3 | 4                    | 5 |  | 0            |

## TRUST IN ADMINISTRATIONS

22. [On a scale from 1 (min) to 5 (max)] **Please indicate how much you agree with the following statements:**

|                                                                                               | Completely disagree |   |   | Completely agree |   |  | I don't know |
|-----------------------------------------------------------------------------------------------|---------------------|---|---|------------------|---|--|--------------|
| 1. The administration will inform me if the flood risks in my home area changes significantly | 1                   | 2 | 3 | 4                | 5 |  | 0            |
| 2. I trust the administration with regard to protection against flooding                      | 1                   | 2 | 3 | 4                | 5 |  | 0            |
| 3. The administration has always done well in terms of protection against flooding in Italy   | 1                   | 2 | 3 | 4                | 5 |  | 0            |

## PUBLIC ASSISTANCE

**23. Sometimes, public bodies offer help with flood protection to private households. What kind of public support from local, regional or national bodies have you received or expect to receive? (Cross anything that applies)**

|                                                                                     | Supporto<br>minimo |   |   | Supporto<br>massimo |   | Non so |
|-------------------------------------------------------------------------------------|--------------------|---|---|---------------------|---|--------|
| 1. Financial aid for financing flood protection<br>(subsidies, loans, etc.)         | 1                  | 2 | 3 | 4                   | 5 | 0      |
| 2. Material support, such as distribution of<br>sandbags and other mobile barriers) | 1                  | 2 | 3 | 4                   | 5 | 0      |
| 3. Information and awareness raising<br>(folders, web-<br>platforms, early warning) | 1                  | 2 | 3 | 4                   | 5 | 0      |

**24. Is your home ensured against flooding?**

1. Yes
2. No
3. I don't know

## SOCIO-ECONOMIC VARIABLES

**25. When were you born? (year)**               

**26. Gender**

1. Male
2. Female
3. Other

**27. The house you are living in is:**

1. Yours/your family property
2. Rented
3. Other (specify \_\_\_\_\_)

**28. Educational qualification** (specify the last school/college year attended)

1. Primary school
2. Middle school
3. Professional high school (usually 3 years)
4. High school (5 years)
5. University degree or higher

29. [On a scale from 1 (min) to 5 (max)] **To satisfy the needs of your family, your income is:**

| Not sufficient |   |   | Largely sufficient |   | I don't know |
|----------------|---|---|--------------------|---|--------------|
| 1              | 2 | 3 | 4                  | 5 | 0            |
